# Supplementary material for: Adenosine mediates functional and metabolic suppression of peripheral and tumor-infiltrating CD8+ T cells
Source: J Immunother Cancer. 2019 Oct 10;7:257. doi: 10.1186/s40425-019-0719-5 (PMC6788118; doi:10.1186/s40425-019-0719-5)
Supplement: Supplementary file 2 — Table S1. Distribution of memory subsets in total and virus-specific CD8 + T cells. Table S2: Clinical characteristics of the patients. (ZIP 61 kb) [file 40425_2019_719_MOESM2_ESM.zip]

Archive with 2 entries (2 files):
- Mastelic, Navarro et al_Suppl Table1.pdf
- Mastelic, Navarro et al_Suppl Table2.pdf
